# Supplementary material for: Formation of nickel–cobalt sulphide@graphene composites with enhanced electrochemical capacitive properties
Source: Royal Society of Chemistry journal article supplement (doi:10.1039/c8ra06906a), 2019-01-01
Supplement: c8ra06906a1.pdf [file c8ra06906a1.pdf]

## Supplementary Information

# Formation of nickel-cobalt sulphide@graphene composites with enhanced electrochemical capacitive properties

Junjie Qiu, Zhongxiong Bai, Shucheng Liu, Yi Liu\*

(School of Physical Sciences, Guizhou University, Guiyang 550025, China)

**Table S1.** electrochemical performance parameters for Ni-Co-S@G//AC supercapacitor

| Current density (A g <sup>-1</sup> ) | Specific capacitance (F g <sup>-1</sup> ) | Energy density (W h Kg <sup>-1</sup> ) | Power density (W Kg <sup>-1</sup> ) |
|--------------------------------------|-------------------------------------------|----------------------------------------|-------------------------------------|
| 1                                    | 217.8                                     | 51.0                                   | 650.3                               |
| 2                                    | 205.0                                     | 48.1                                   | 1340.5                              |
| 3                                    | 190.5                                     | 44.7                                   | 1945.4                              |
| 4                                    | 178.9                                     | 41.9                                   | 2610.8                              |
| 5                                    | 168.2                                     | 39.4                                   | 3270.2                              |
| 6                                    | 152.5                                     | 35.7                                   | 3956                                |
| 7                                    | 139.8                                     | 32.8                                   | 4598                                |
| 8                                    | 120.2                                     | 28.2                                   | 5235                                |
| 9                                    | 109.7                                     | 25.7                                   | 5850                                |
| 10                                   | 101.6                                     | 23.9                                   | 6521                                |
| 11                                   | 90.6                                      | 21.1                                   | 7099                                |
| 12                                   | 84.0                                      | 19.7                                   | 7800                                |
| 13                                   | 76.0                                      | 17.8                                   | 8450                                |
| 14                                   | 70.0                                      | 16.4                                   | 9100                                |
| 15                                   | 65.7                                      | 15.4                                   | 9750                                |
| 16                                   | 61.5                                      | 14.4                                   | 10393                               |
| 17                                   | 57.5                                      | 13.5                                   | 11050                               |
| 18                                   | 54.3                                      | 12.7                                   | 11700                               |

\* Corresponding author. E-mail address: yliu9@gzu.edu.cn (Yi Liu)

**Table S2.** Performance comparison of Ni-Co-S based electrode materials for supercapacitors

| materials                                                                   | Specific capacitance $\text{Fg}^{-1}$ (conditions) | Capacitance retention (circles) | Energy density ( $\text{Wh kg}^{-1}$ ) | Power density ( $\text{W kg}^{-1}$ ) | electrolyte | reference |
|-----------------------------------------------------------------------------|----------------------------------------------------|---------------------------------|----------------------------------------|--------------------------------------|-------------|-----------|
| NiCo <sub>2</sub> S <sub>4</sub> @Graphene                                  | 1432.5<br>(1 A g <sup>-1</sup> )                   | 83.4%<br>(5000)                 | 43.4                                   | 254.3                                | 2M KOH      | 1         |
| Ni-Co sulfide nanowires                                                     | 1176<br>(30 mA cm <sup>-2</sup> )                  | 78.5%<br>(3000)                 | 25                                     | 447                                  | 1M KOH      | 2         |
| NiCo <sub>2</sub> S <sub>4</sub> @MnO <sub>2</sub>                          | 1337.8<br>(2 A g <sup>-1</sup> )                   | 82%<br>(2000)                   | None                                   | None                                 | 6M KOH      | 3         |
| Carbon@NiCo <sub>2</sub> S <sub>4</sub>                                     | 1455<br>(1 A g <sup>-1</sup> )                     | 83%<br>(2000)                   | None                                   | None                                 | 6M KOH      | 4         |
| NiCo <sub>2</sub> S <sub>4</sub> ball in ball spheres                       | 1036<br>(1 A g <sup>-1</sup> )                     | 87%<br>(2000)                   | 42.3                                   | 476                                  | 6M KOH      | 5         |
| Onion-like NiCo <sub>2</sub> S <sub>4</sub> particles                       | 1016<br>(2 A g <sup>-1</sup> )                     | 87%<br>(10000)                  | 42.7                                   | 1583                                 | 6M KOH      | 6         |
| NiCo <sub>2</sub> S <sub>4</sub> nanostructured arrays                      | 1154<br>(1 A g <sup>-1</sup> )                     | 92.8<br>(8000)                  | 17.3                                   | 200                                  | 2M KOH      | 7         |
| NiCo <sub>2</sub> S <sub>4</sub> nanosheets/ carbon foams                   | 1231<br>(2 A g <sup>-1</sup> )                     | 90.4%<br>(2000)                 | 45.5                                   | 512                                  | 6M KOH      | 8         |
| Porous Ni <sub>1.5</sub> Co <sub>1.5</sub> S <sub>4</sub>                   | 1093<br>(1 A g <sup>-1</sup> )                     | 108%<br>(2000)                  | 37.6                                   | 775                                  | 6M KOH      | 9         |
| Mesoporous NiCo <sub>2</sub> S <sub>4</sub> nanoparticles                   | 1440<br>(3 A g <sup>-1</sup> )                     | 91.7%<br>(5000)                 | 28.3                                   | 245                                  | 2M KOH      | 10        |
| NiCo <sub>2</sub> S <sub>4</sub> urchin-like nanostructures                 | 1149<br>(1 A g <sup>-1</sup> )                     | 91.4%<br>(5000)                 | None                                   | None                                 | 6M KOH      | 11        |
| NiCo <sub>2</sub> S <sub>4</sub> hollow spheres                             | 1263<br>(2 A g <sup>-1</sup> )                     | 87%<br>(20000)                  | None                                   | None                                 | 1M KOH      | 12        |
| Co <sub>1.5</sub> Ni <sub>1.5</sub> S <sub>4</sub> dendrite/quasi spherical | 1321.9<br>(1 A g <sup>-1</sup> )                   | 88.8%<br>(2000)                 | 32.4                                   | 103.4                                | 2M KOH      | 13        |
| Ni-Co-S/graphene                                                            | 1492<br>(1 A g <sup>-1</sup> )                     | None                            | 43.3                                   | 800                                  | 6M KOH      | 14        |
| Ni-Co-S/NF                                                                  | 1406.9<br>(0.5 A g <sup>-1</sup> )                 | 88.6%<br>(1000)                 | 24.8                                   | 849.5                                | 1M KOH      | 15        |
| CNTs@Ni-Co-S nanosheets                                                     | 222 mAh g <sup>-1</sup><br>(4 A g <sup>-1</sup> )  | 90.6%<br>(2000)                 | 46.5                                   | 800                                  | 6M KOH      | 16        |
| Ni-Co-S                                                                     | 1377.5<br>(1 A g <sup>-1</sup> )                   | 93.7%<br>(3000)                 | 36.9                                   | 1066.42                              | 3M KOH      | 17        |
| NiCo <sub>2</sub> S <sub>4</sub> nanosheet                                  | 1490.3                                             | 93.2%                           | 35.17                                  | 555.6                                | 2M KOH      | 18        |

|                                                  |                                                               |                           |      |        |         |           |
|--------------------------------------------------|---------------------------------------------------------------|---------------------------|------|--------|---------|-----------|
| NiCo <sub>2</sub> S <sub>4</sub> nano-petals     | (30 mA cm <sup>-2</sup> )<br>2036.5<br>(1 A g <sup>-1</sup> ) | (5000)<br>94.3%<br>(5000) | 35.6 | 819.5  | 1 M KOH | 19        |
| NiCo <sub>2</sub> S <sub>4</sub> nanotube        | 14.39 F cm <sup>-2</sup><br>(5 mA cm <sup>-2</sup> )          | 92%<br>(5000)             | 16.6 | 2348.5 | 6 M KOH | 20        |
| Core-shell NiCo <sub>2</sub> S <sub>4</sub>      | 1948<br>(1 A g <sup>-1</sup> )                                | 94%<br>(5000)             | 10.6 | 2470   | 6 M KOH | 21        |
| Hollow NiCo <sub>2</sub> S <sub>4</sub> nanotube | 1279<br>(1 A g <sup>-1</sup> )                                | 92%<br>(2000)             | 21   | 4725   | 6 M KOH | 22        |
| NiCo <sub>2</sub> S <sub>4</sub> nanosheets      | 744<br>(1 A g <sup>-1</sup> )                                 | 93.4 %<br>(1500)          | 10.8 | 8000   | 3 M KOH | 23        |
| Ni-Co-S@graphene                                 | 1463<br>(1 A g <sup>-1</sup> )                                | 87.4%<br>(1000)           | 51.0 | 650.3  | 6M KOH  | This work |

## References

1. F. Yu, Z. Chang, X. H. Yuan, F. X. Wang, Y. S. Zhu, L. j. Fu, Y. H. Chen, H. X. Wang, Y. P. Wu and W.S.Li, *J. Mater. Chem. A*, 2018, **2**, 1039.
2. Y. Li, L. Cao, L. Qiao, M. Zhou, Y. Yang, P. Xiao and Y. Zhang. *J. Mater. Chem. A*, 2014, **2**, 6540.
3. J. Yang, M. Ma, C. Sun, Y. Zhang, W. Huang and X. Dong, *J. Mater. Chem. A*, 2015, **3**, 1258.
4. L. Q. Li, Z. Y. Dai, Y. F. Zhang, J. Yang, W. Huang and X. C. Dong, *RSC Adv.*, **2015**, **5**, 83408.
5. L. Shen, L. Yu, H. B. Wu, X. Y. Yu, X. Zhang and X. W. Lou, *Nat. Commun.*, 2015, **6**, 6694.
6. B. Y. Guan, L. Yu, X. Wang, S. Y. Song and X. W. (David). Lou. *Adv. Mater.*, 2017, **2**, 1605051.
7. X. H. Xiong, G. Waller, D. Ding, D. Chen, B. Rainwater, B. Zhao, Z. Wang and M. Liu. *Nano Energy*, 2015, **16**, 71.
8. L. F. Shen, J. Wang, G. Y. Xu, H. S. Li, H. Dou and X. Zhang, *Adv. Energy Mater.*, 2015, **5**, 1400977.
9. H. Chen, J. Jiang, Y. Zhao, L. Zhang, D. Guo and D. Xia, *J. Mater. Chem. A*, 2015, **3**, 428.

10. Y. R. Zhu, Z. B. Wu, M. J. Jing, X. M. Yang, W. X. Song and X. B. Ji, *J. Power Sources.*, 2015, **273**, 584.
11. H. C. Chen, J. J. Jiang, L. Zhang, H. Z. Wan, T. Qia and D. D. Xia, *Nanoscale*, 2013,**5**, 8879.
12. C. Xia and H. N. Alshareef, *Chem. Mater.*, 2015, **27**, 4661.
13. Y. Tang, T. Chen, S. Yu, Y. Qiao, S. Mu, S. Zhang, Y. Zhao, L. Hou, W. Huang and F. Gao, *J. Power Sources*, 2015, **295**, 314.
14. J. Yang, C. Yu, X. Fan, S. Liang, S. Li, H. Huang, Z. Ling, C. Hao and J. Qiu, *Energy Environ. Sci.*, 2016, **9**, 1299.
15. K. Tao, X. Han, Q. X. Ma and L. Han, *Dalton Trans.*, 2018, **47**, 3496.
16. T. Q. Peng, H. Yi, P. Sun, Y. T. Jing, R. J. Wang, H. W. Wang and X. F. Wang, *J. Mater. Chem. A*, 2016, **4**, 8888.
17. C. Chen, M. K. Wu, K. Tao, J. J. Zhou, Y. L. Li, X. Han and L. Han, *Dalton Trans.*, 2018, **47**, 5639.
18. L. Y. Lin, J. L. Liu, T. M. Liu, J. H. Hao, K. M. Ji, R. Sun, W. Zeng and Z. C. Wang, *J. Mater. Chem. A*, 2015, **3**, 17652.
19. Y. X. Wen, S. L. Peng, Z. L. Wang, J. X. Hao, T. F. Qin, S. Q. Lu, J. C. Zhang, D. Y. He, X. Y. Fan and G. Z. Cao, *J. Mater. Chem. A*, 2017, **5**, 7144.
20. H. C. Chen, J. J. Jiang, L. Zhang, D. D. Xia, Y. D. Zhao, D. Q. Guo, T. Qi and H. Z. Wan, *J. Power Sources*, 2014, **254**, 249.
21. W. Kong, C. C. Lu, W. Zhang, J. Pu and Z. H. Wang, *J. Mater. Chem. A*, 2015, **3**, 12452.
22. L. Hao, L. Shen, J. Wang and Y. Xu, X. Zhang, *RSC Adv.*, 2016, **6**, 9950.
23. Z. B. Wu, X. L. Pu, X. B. Ji, Y. R. Zhu, M. J. Jing, Q. Y. Chen and F. P. Jiao, *Electrochim. Acta*, 2015, **174**, 238.
